# Supplementary material for: Moving university hydrology education forward with community-based geoinformatics, data and modeling resources
Source: Copernicus journal article supplement (doi:10.5194/hess-16-2393-2012), 2012-08-02
Supplement: Supplementary file 1 [file hess-16-2393-2012-supplement.pdf]

## Supplement

### List of workshop participants

| <b>Name</b>               | <b>Department</b>                      | <b>Institution</b>              |
|---------------------------|----------------------------------------|---------------------------------|
| Brame, Scott              | Env. Engg / Earth Science              | Clemson University              |
| Coonrod, Julie            | Civil Engineering                      | Univ. of New Mexico             |
| Cranganu, Constantin      | Geology                                | CUNY, Brooklyn                  |
| Flores, Lejo              | Geosciences                            | Boise State University          |
| Gu, Chuanhui              | Geology                                | Appalachian State Univ.         |
| Ji, Wei                   | Geosciences                            | Univ. of Missouri - Kansas City |
| Johnson, Lynn             | Civil Engineering                      | Univ. of Colorado, Denver       |
| Labadie, John             | Civil Engineering                      | Colorado State University       |
| Lea, Peter                | Earth and Oceanographic Science        | Bowdoin University              |
| Li, Shu-Guang             | Civil and Environmental Engineering    | Michigan State Univ.            |
| Kumar, Sanjiv             | Civil Engineering                      | Purdue University               |
| Mahat, Vinod              | Civil Engineering                      | Utah State University           |
| McGuire, Kevin            | Forest Resources and Env. Conservation | Virginia Tech                   |
| Meixner, Thomas           | Hydrology and Water Resources          | University of Arizona           |
| Merwade, Venkatesh        | Civil Engineering                      | Purdue University               |
| Minsker, Barbara          | Civil Engineering                      | University of Illinois          |
| Miller, Andrew            | Geography                              | University of Maryland          |
| Moglen, Glenn             | Civil Engineering                      | Virginia Tech                   |
| Miller, Thomas            | Geology                                | Univ. of Puerto Rico Mayaguez   |
| Murray, Kyle              | Geological Sciences                    | Univ. of Texas at San Antonio   |
| Patino, Lina              | Earth Sciences                         | National Science Foundation     |
| Peckham, Scott            | CSDMS group                            | University of Colorado          |
| Raleigh, Mark             | Civil and Environmental Engineering    | University of Washington        |
| Ruddell, Benjamin         | College of Technology                  | Arizona State Univ.             |
| Sharif, Hatim             | Civil and Environmental Engineering    | Univ. of Texas. San Antonio     |
| Tarboton, David           | Civil Engineering                      | Utah State Univ.                |
| Tian, Yong                | Env. Coastal and Ocean Sciences        | UMass - Boston                  |
| Viswanathan, Chandramouli | Civil Engineering                      | Purdue Calumet                  |
| Zlotnik, Vitaly           | Geosciences                            | Univ. of Nebraska, Lincoln      |
